# Supplementary material for: Comparison of epigenetic profiles of human oral epithelial cells from HIV-positive (on HAART) and HIV-negative subjects
Source: PubMed Central journal article supplement — Epigenetics. 2013 May 17;8(7):703–9. doi: 10.4161/epi.25028 (PMC3781189; doi:10.4161/epi.25028), 2013-05-17
Supplement: epi-8-703-s01.pdf [file epi-8-703-s01.pdf]

## **Supplemental Material to:**

**Santosh K. Ghosh, Thomas S. McCormick, Betty L. Eapen,  
Elizabeth Yohannes, Mark R. Chance and Aaron Weinberg**

**Comparison of epigenetic profiles of human oral epithelial  
cells from HIV positive (on HAART) and HIV negative  
subjects**

**Epigenetics 2013; 8(7)**

**<http://dx.doi.org/10.4161/epi.25028>**

**[http://www.landesbioscience.com/journals/epigenetics/  
article/25028/](http://www.landesbioscience.com/journals/epigenetics/article/25028/)**

Supplementary information:

**Table S1:** Clinical data for HIV+ (on HAART) samples used in this study

| <i>Sample numbers</i> | <i>CD4 cell (cells/mL)</i> | <i>Viral Load (virus/ml)<sup>#</sup></i> | <i>HAART Regime<sup>**</sup></i> | <i>Used in Figures</i> |
|-----------------------|----------------------------|------------------------------------------|----------------------------------|------------------------|
| <b>1</b>              | 1226                       | U                                        | Aba/Ten/Efa                      | <b>1A; 2;S1</b>        |
| <b>2</b>              | 622                        | U                                        | Ten/Ata/Rit/ Aba                 | <b>1A;2;4</b>          |
| <b>3</b>              | 454                        | U                                        | Nor/Lex/Tru                      | <b>1A;2;4</b>          |
| <b>4</b>              | 1170                       | 48                                       | Epz/Ten/Ata/Rit                  | <b>1B;4; S1</b>        |
| <b>5</b>              | 543                        | 48                                       | Tru/Rit/Ata                      | <b>1B; 2; S1</b>       |
| <b>6</b>              | 264                        | 48                                       | Rit/Ata                          | <b>1B; 2; S1</b>       |
| <b>7</b>              | 374                        | 48                                       | Nor/Pre/Sus/Vir                  | <b>1B; 2,4; S1</b>     |
| <b>8</b>              | 730                        | 48                                       | Atr                              | <b>1B; 2; S1</b>       |
| <b>9</b>              | 525                        | 48                                       | Epi/Sel/Ise                      | <b>1B; 2; S1</b>       |
| <b>10</b>             | 361                        | U                                        | Pre/Tru/Int                      | <b>4; S1</b>           |
| <b>11</b>             | 480                        | U                                        | Vir/Ret/Epi                      | <b>2;4; S1</b>         |
| <b>12</b>             | 834                        | U                                        | Atr                              | <b>4</b>               |

\***Aba:** Abacavir; **Ata:** Atazanavir; **Atr:** Atripla; **Efa:**Efavirenz; **Epi:** Eпивir; **Epz:** Epzicom; **Int:** Intellence; **Ise:** Isentress; **Lex:** Lexiva; **Nor:** Norvir; **Pre:** Prezista; **Ret:** Retrovir; **Rit:** Ritonavir; **Sel:** Selzentry; **Sus:** Sustiva; **Ten:** Tenofovir; **Tru:** Truvada; **Vir:** Viread;  
**\*\*U=** Undetectable

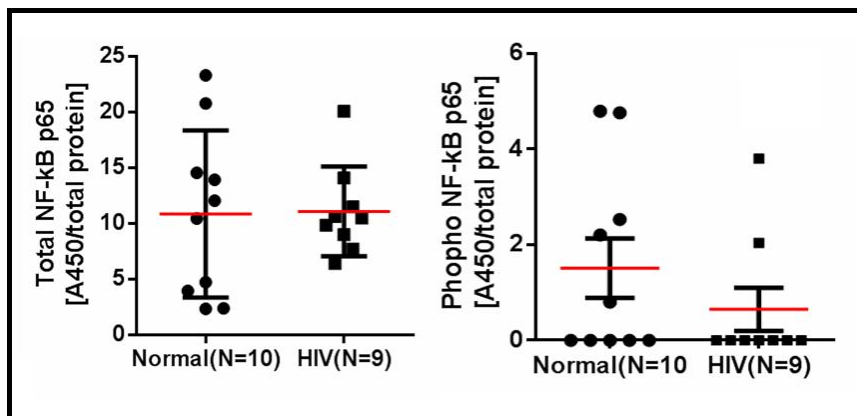

Figure S1: Comparison of endogenous levels of total and phosphor NF-κB in the cell lysates of normal and HIV+ (O/H) subjects. The red bar is the mean values. The red bar is the mean values [ $*= p<0.05$ , Mann-Whitney t test]. Total and phospho-p65 NF-κB in the cell lysates of were determined by PathScan ELISA (Cell Signaling, Danvers, MA)

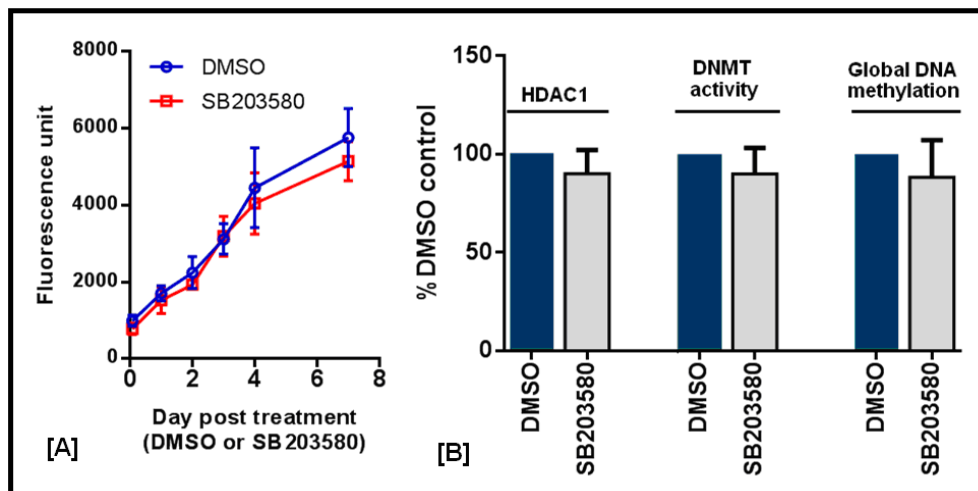

Figure S2: **[A]**. POECs from three healthy individuals were mixed and seeded onto 96 well plates. After 24 hrs the cells were pretreated with either SB SB203580 (10 $\mu$ M) or DMSO (5 $\mu$ l/ml) for 2hrs and cell growth was measured using PrestoBlue® Reagent for 7 days. Results are the mean [ $\pm$ SD] of quadruple wells. **[B]** POECs from healthy subjects were pretreated with either SB SB203580 (10 $\mu$ M) or DMSO (5 $\mu$ l/ml) for 2hrs and then allowed to grow for an additional 24 hrs. The nuclear extracts and genomic DNA were isolated and the levels of HDAC1 and DNMT activity in the nuclear extracts were measured. Global DNA methylation was determined as the percentage of 5-mC in total DNA. The results of HDAC1 levels, DNMT activity and global DNA methylation in SB SB203580 treated cells were expressed as %DMSO control cells. Results are the mean ( $\pm$  SD) of triplicate experiments
